# Supplementary material for: Metal–organic framework derived nitrogen-doped carbon-RhNi alloys anchored on graphene for highly efficient hydrogen evolution reaction
Source: Royal Society of Chemistry journal article supplement (doi:10.1039/d0qi00192a), 2020-01-01
Supplement: d0qi00192a1.pdf [file d0qi00192a1.pdf]

## Supporting Information

### **Metal-Organic Frameworks Derived Nitrogen-Doped Carbon-RhNi Alloys Anchored on Graphene for Highly Efficient Hydrogen Evolution Reaction**

Xian-Ming Xia,<sup>†a</sup> Cheng-ZongYuan,<sup>†b</sup> Gang Wang,<sup>b</sup> Cong Ling,<sup>b</sup> Tan Zhao,<sup>b</sup> Wan-Qing Li,<sup>a</sup> Yuck-Yun Cheang,<sup>\*c</sup> Sheng-Liang Zhong<sup>\*a</sup> and An-Wu Xu<sup>\*b</sup>

<sup>a</sup> College of Chemistry and Chemical Engineering, Jiangxi Normal University, Nanchang 330022, P. R. China. E-mail: slzhong@jxnu.edu.cn

<sup>b</sup> Division of Nanomaterials and Chemistry, Hefei National Laboratory for Physical Sciences at the Microscale, The First Affiliated Hospital, University of Science and Technology of China, Hefei 230026, P. R. China. E-mail: anwuxu@ustc.edu.cn.

<sup>c</sup> The First Affiliated hospital of Guangdong Pharmaceutical University, Guangzhou 510080, China. [13631322559@163.com](mailto:13631322559@163.com)

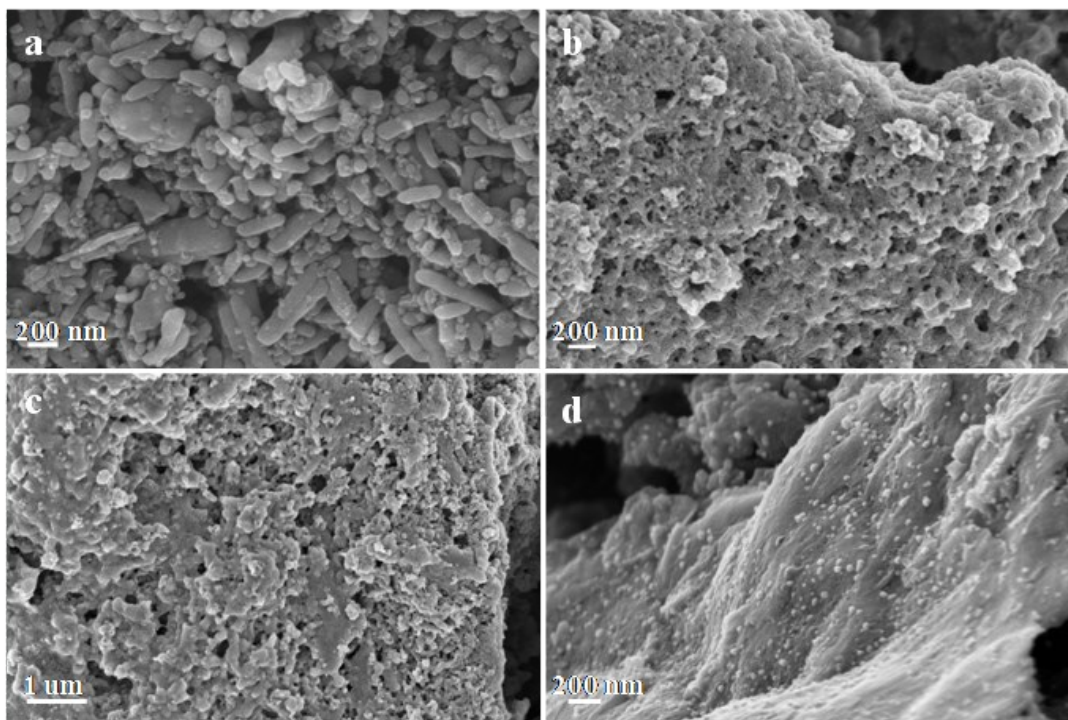

**Fig. S1** SEM images of (a) NC-Ni, (b) NC-Rh, (c) NC-RhNi and (d) NC-RhNi/rGO.

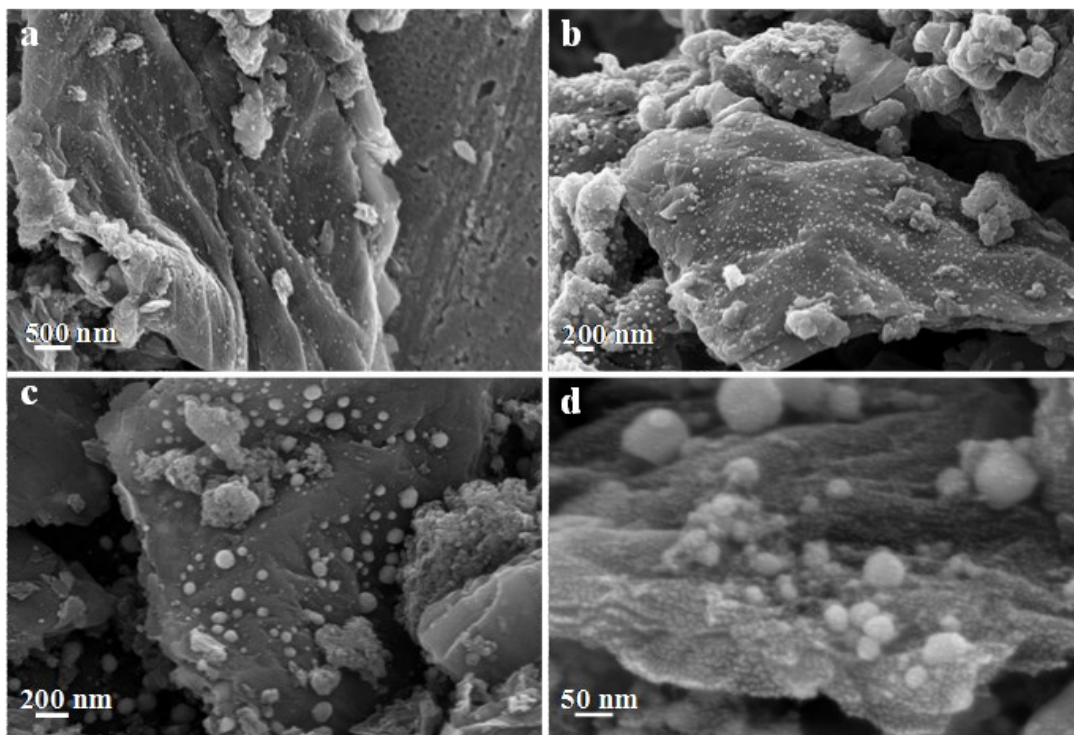

**Fig. S2** SEM images of different ratio of Rh and Ni (a) 1:1, (b) 1:2, (c) 1:3 and (d) 2:1.

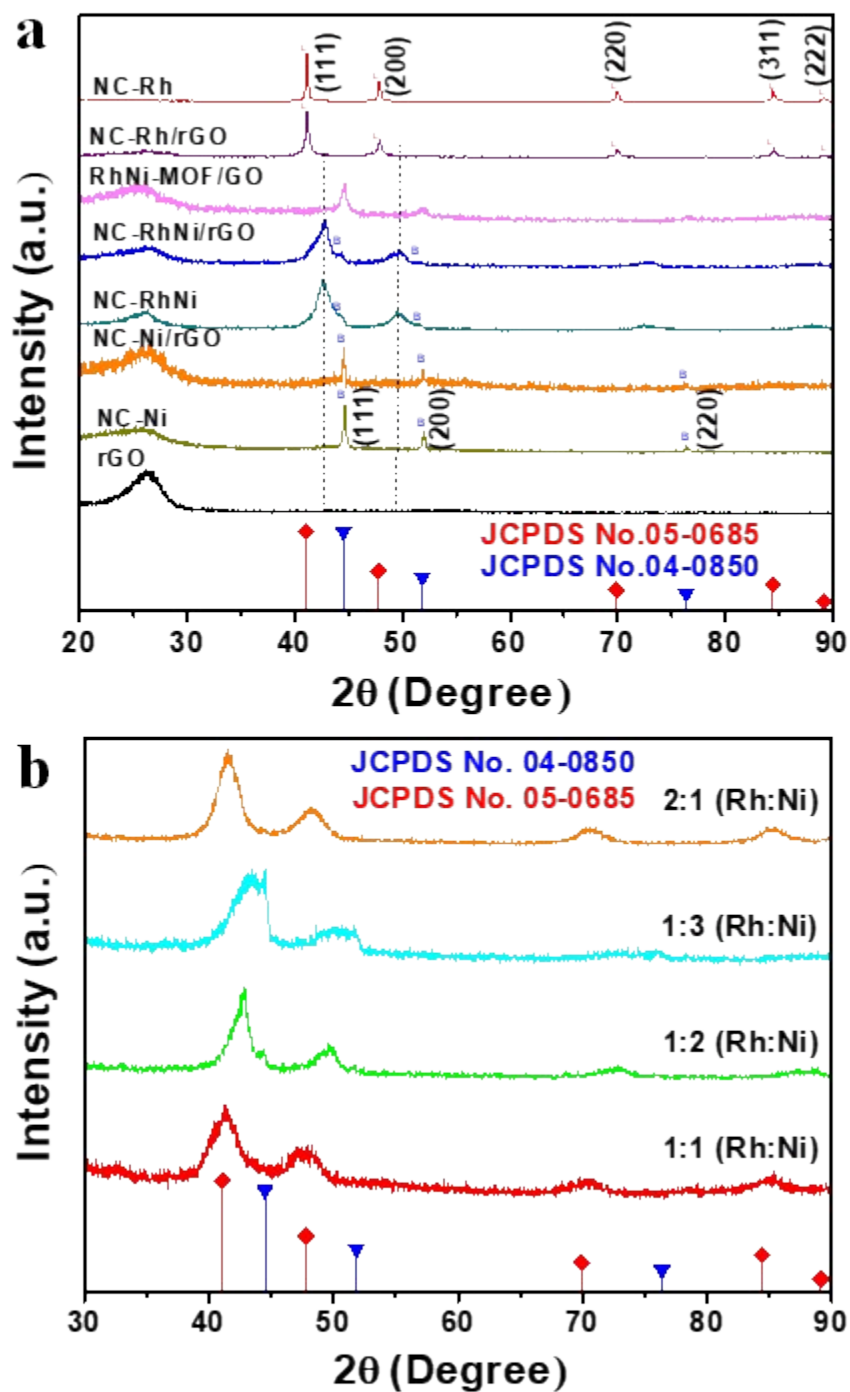

**Fig. S3** (a) XRD patterns for rGO, NC-Ni, NC-Ni/rGO, NC-RhNi, NC-RhNi/rGO, RhNi-MOF/GO, NC-Rh/rGO and NC-Rh, (b) XRD patterns of samples with different ratios of Rh to Ni.

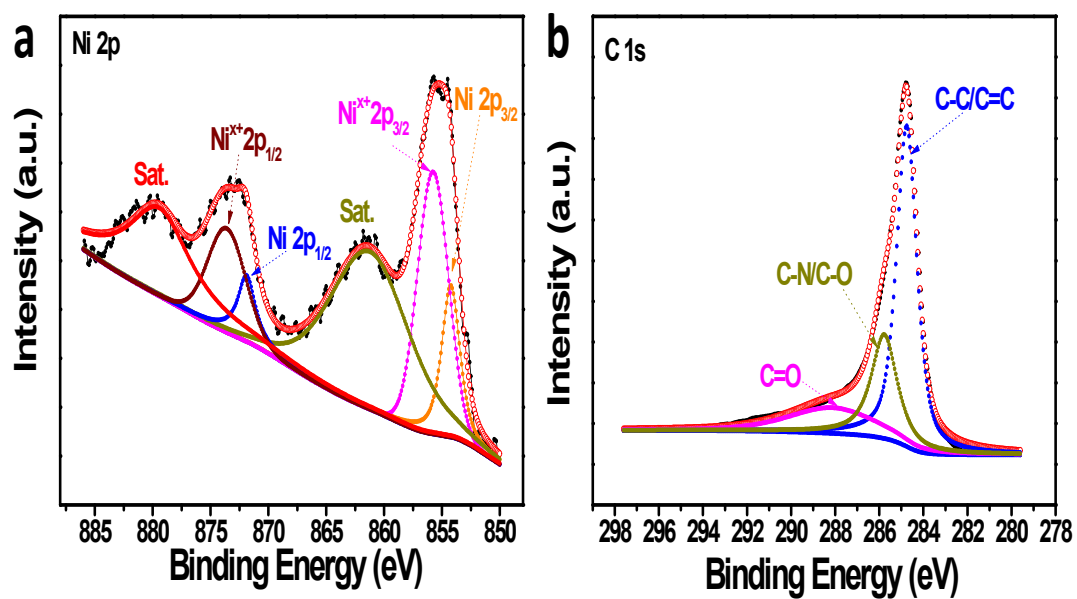

**Fig. S4** High-resolution XPS spectra for (a) Ni 2p and (b) C 1s.

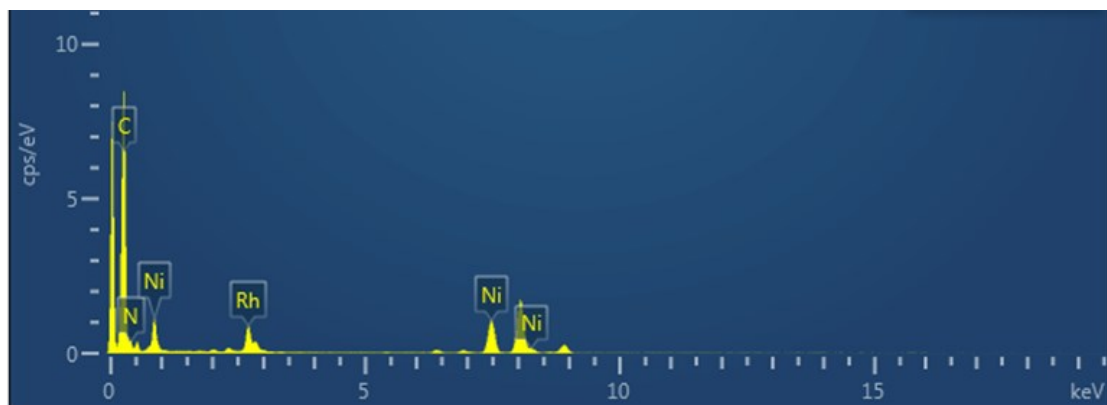

**Fig. S5** Energy-dispersive spectroscopic (EDS) pattern of NC-RhNi/rGO.

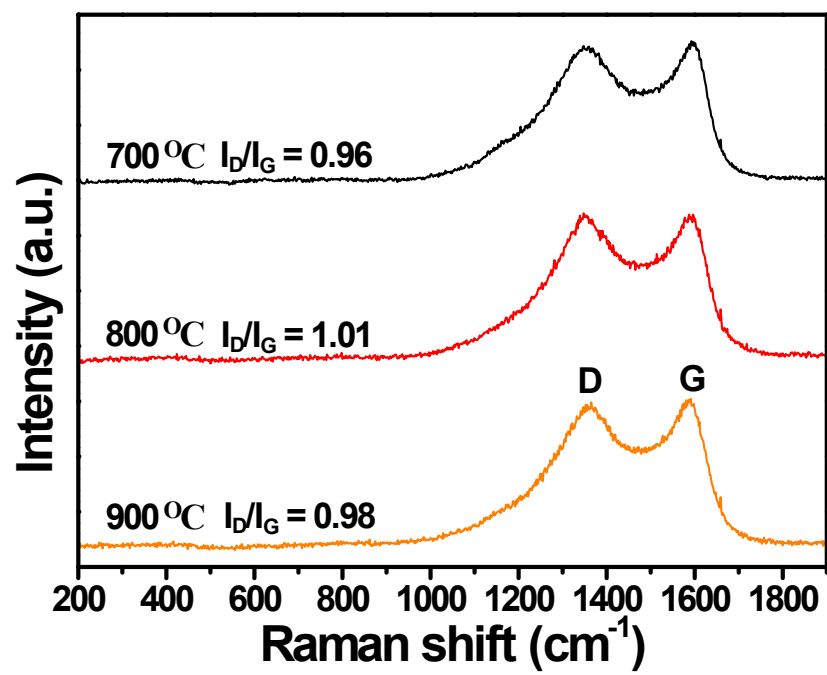

**Fig. S6** Raman spectra of the samples calcinated at different temperatures.

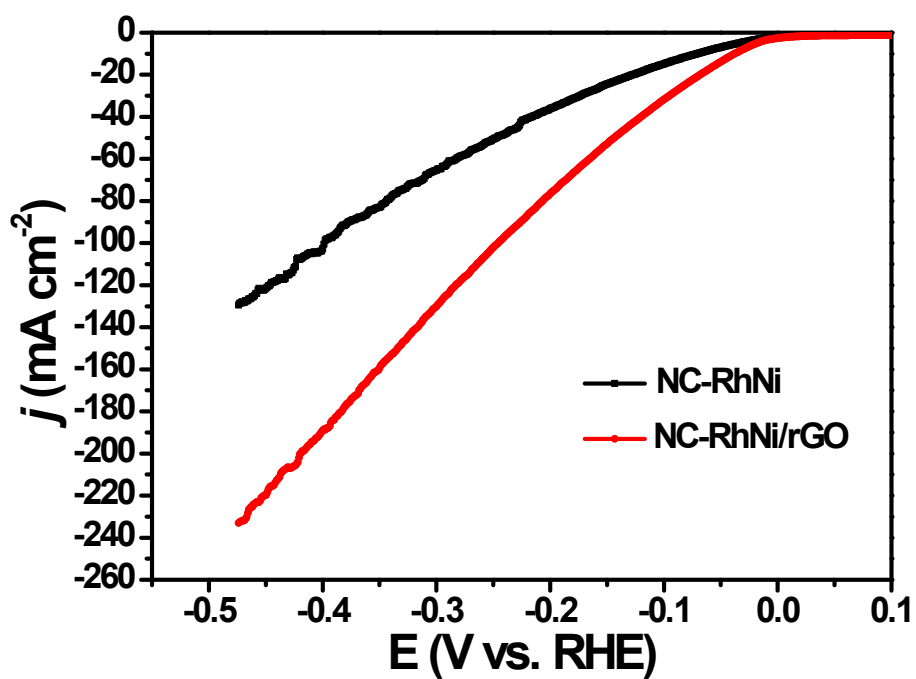

**Fig. S7** Linear sweep polarization curves of NC-RhNi and NC-RhNi/rGO obtained in 1.0 M KOH at a scan rate of 5 mV s<sup>-1</sup>.

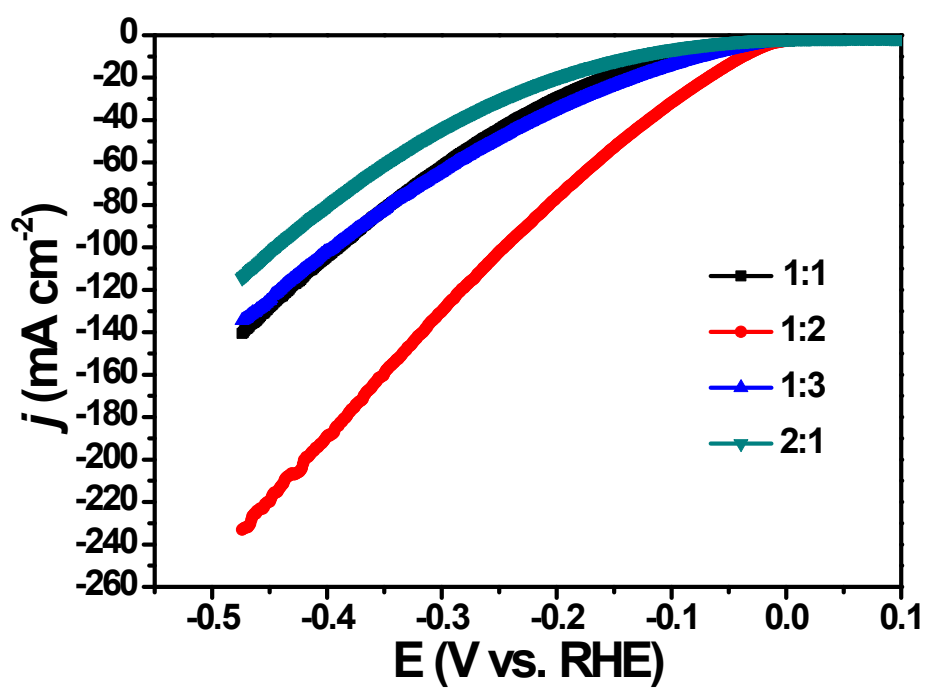

**Fig. S8** Linear sweep polarization curves of NC-RhNi/rGO with different rate of Rh to Ni obtained in 1.0 M KOH at a scan rate of 5 mV s<sup>-1</sup>.



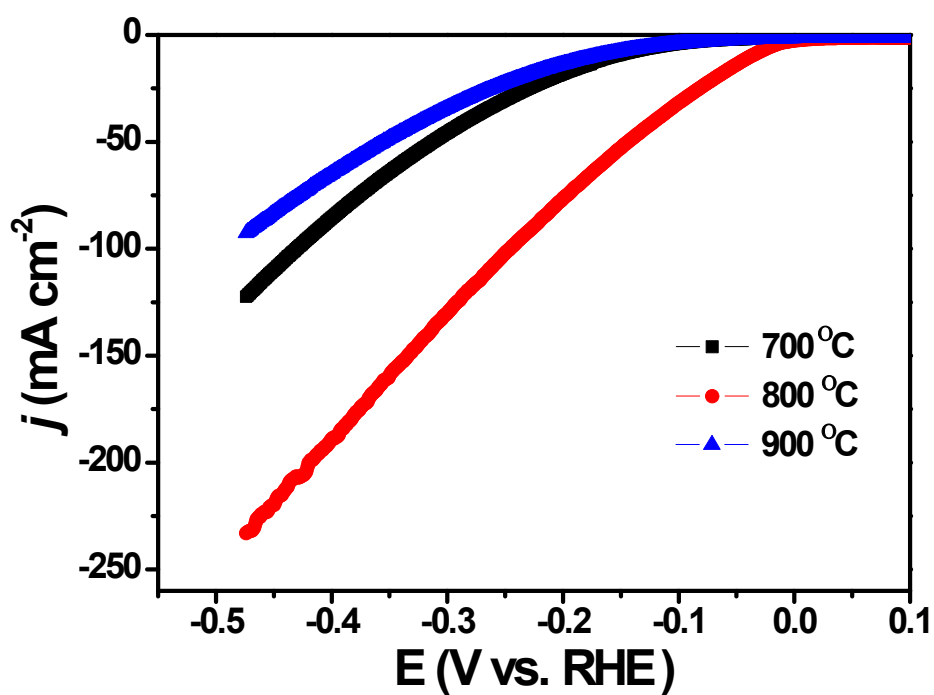

**Fig. S9** Linear sweep polarization curves of NC-RhNi/rGO obtained by different calcinate temperatures at a scan rate of 5 mV s<sup>-1</sup> in 1.0 M KOH.

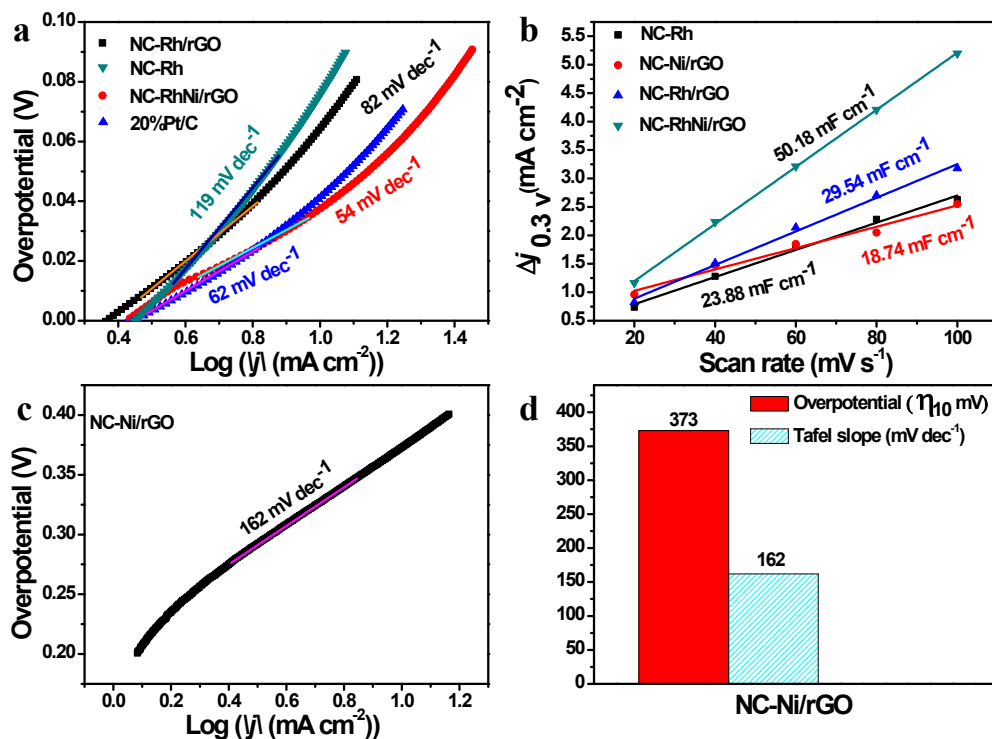

**Fig. S10** (a) the corresponding Tafel plots of NC-Rh/rGO, NC-RhNi/rGO, NC-Rh and 20% Pt/C. (b) Estimation of electrochemical double-layer capacitance ( $C_{dl}$ ) for various electrocatalysts by plotting the difference in current densities at 0.3 V versus RHE for NC-Ni/rGO, NC-RhNi/rGO, NC-Rh/rGO and NC-Rh. (c) The corresponding Tafel plot of NC-Ni/rGO, and (d) Comparison of overpotential at a current density of  $10 \text{ mA cm}^{-2}$  and Tafel slope of NC-Ni/rGO in 1.0 M KOH.

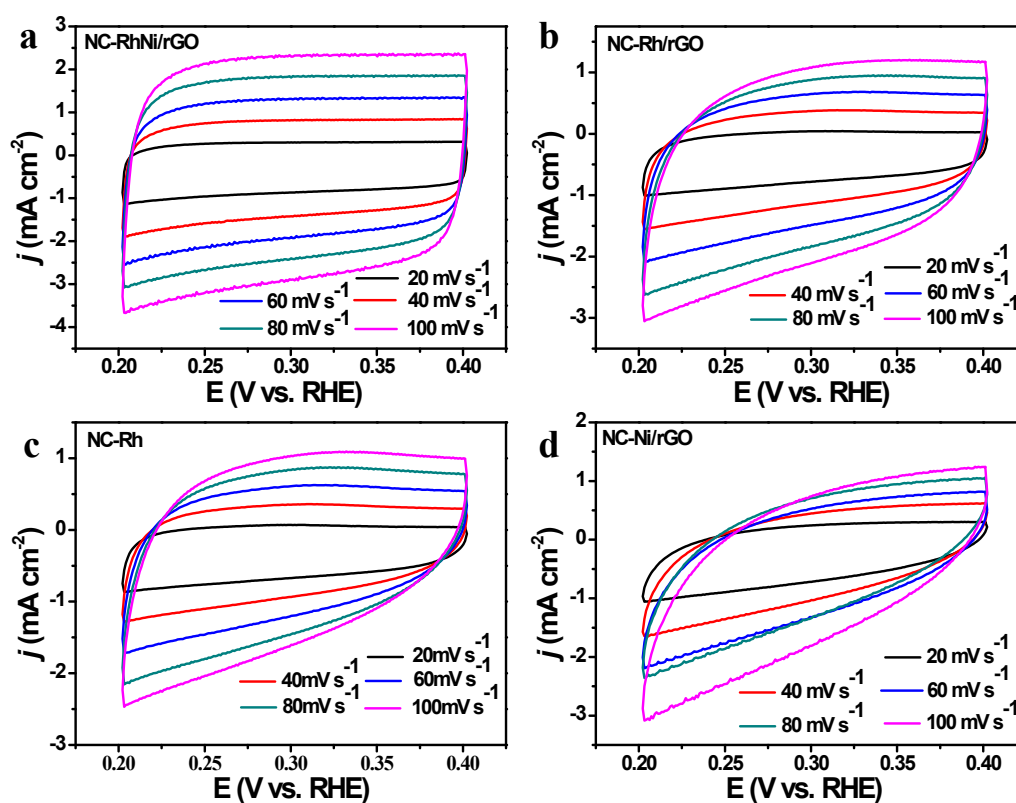

**Fig. S11** Cyclic voltammograms (CV) curves of (a) NC-RhNi/rGO, (b) NC-Rh/rGO, (c) NC-Rh, and (d) NC-Ni/rGO in the region of 0.20-0.40V vs. RHE in 1.0 M KOH at various scan rates.

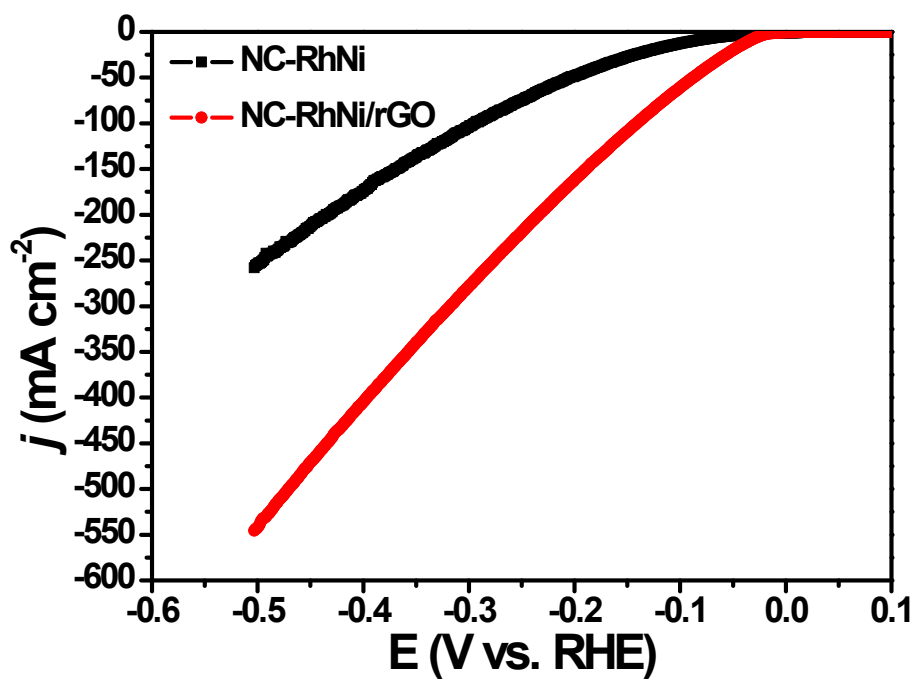

**Fig. S12** Linear sweep polarization curves of NC-RhNi/rGO and NC-RhNi obtained in 0.5 M H<sub>2</sub>SO<sub>4</sub> at a scan rate of 5 mV s<sup>-1</sup>.

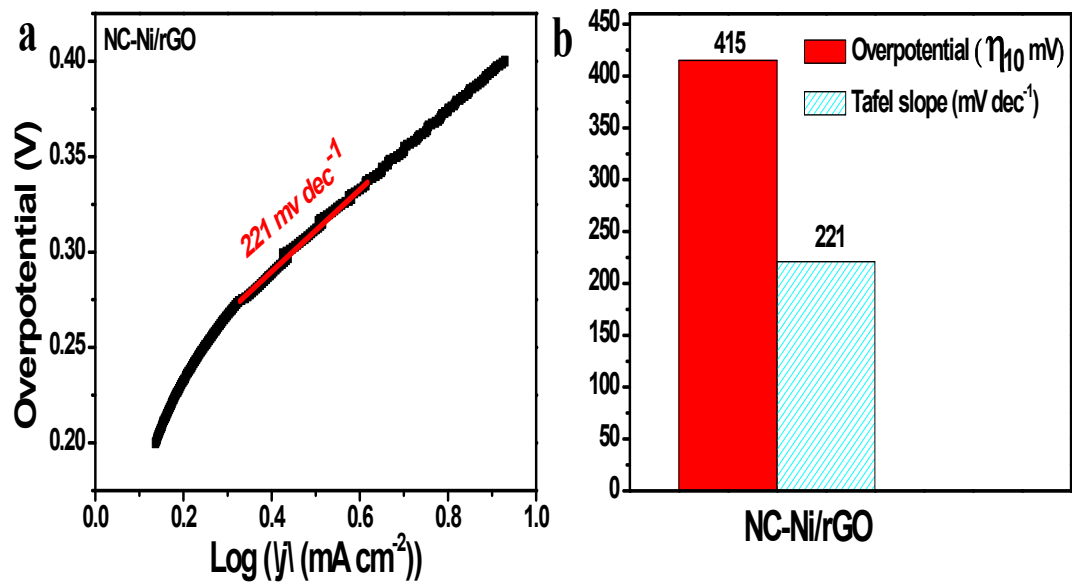

**Fig. S13** (a) The corresponding Tafel plot of NC-Ni/rGO and (b) Comparison of overpotential at a current density of 10 mA cm<sup>-2</sup> and Tafel slope of NC-Ni/rGO in 0.5 M H<sub>2</sub>SO<sub>4</sub>.

**Table S1.** The atomic ratio of NC-RhNi/rGO obtained from XPS spectra.

| Element            | Rh 3d | Ni 2p | C 1s   | N 1s  | O 1s      |
|--------------------|-------|-------|--------|-------|-----------|
| <b>NC-RhNi/rGO</b> | 0.49% | 1.75% | 83.92% | 5.73% | 8.11<br>% |

**Table S2.** Comparison of HER performance with that of recently reported alloy electrocatalysts.

| Electrocatalysts                          | Electrolyte                          | $\eta_{10}$<br>(mV) | Tafel slope<br>(mV dec <sup>-1</sup> ) | References |
|-------------------------------------------|--------------------------------------|---------------------|----------------------------------------|------------|
| <b>Cu-Ni nanocages</b>                    | 1 M KOH                              | 140                 | 79                                     | [1]        |
| <b>Ni<sub>x</sub>Cu<sub>y</sub>@NG-NC</b> | 1 M KOH                              | 122                 | 84.2                                   | [2]        |
| <b>IrNi@OC</b>                            | 1 M KOH                              | 27                  | 50                                     | [3]        |
| <b>Pt-Ni hetero</b>                       | 1 M KOH                              | 48                  |                                        | [4]        |
| <b>CoRu<sub>x</sub>@N-C</b>               | 1 M KOH                              | 27                  | 73                                     | [5]        |
|                                           | 0.5 M H <sub>2</sub> SO <sub>4</sub> | 94                  | 64                                     |            |
| <b>PtRh ANDs</b>                          | 0.5 M H <sub>2</sub> SO <sub>4</sub> | 25                  | 32                                     | [6]        |
| <b>NiRu@N-C</b>                           | 0.5 M H <sub>2</sub> SO <sub>4</sub> | 50                  | 36                                     | [7]        |
| <b>CoNi@NC</b>                            | 0.1 M H <sub>2</sub> SO <sub>4</sub> | 142                 | 105                                    | [8]        |
| <b>NiCu@C</b>                             | 0.5 M H <sub>2</sub> SO <sub>4</sub> | 48                  | 63.2                                   | [9]        |
|                                           | 1 M KOH                              | 74                  | 94.5                                   |            |
| <b>RuAu SAAs</b>                          | 1 M KOH                              | 24                  | 37                                     | [10]       |
| <b>hcp Pt-Ni</b>                          | 1 M KOH                              | 65                  | 78                                     | [11]       |
| <b>NC-RhNi/rGO</b>                        | 1 M KOH                              | 37                  | 54                                     | This work  |
|                                           | 0.5 M H <sub>2</sub> SO <sub>4</sub> | 34                  | 22                                     |            |

## References

1. Z. X. Li, C. C. Yu, Y. Y. Wen, Y. Gao, X. F. Xing, Z. T. Wei, H. Sun, Y. W. Zhang and W. Y. Song, Mesoporous Hollow Cu-Ni Alloy Nanocage from Core-Shell Cu@Ni Nanocube for Efficient Hydrogen

- Evolution Reaction, *ACS Catal.*, 2019, **9**, 5084-5095.
2. B. Liu, H. Q. Peng, J. Y. Cheng, K. Zhang, D. Chen, D. Shen, S. L. Wu, T. P. Jiao, X. Kong, Q. L. Gao, S. Y. Bu, C. S. Lee and W. J. Zhang, Nitrogen-Doped Graphene-Encapsulated Nickel–Copper Alloy Nanoflower for Highly Efficient Electrochemical Hydrogen Evolution Reaction, *Small*, 2019, 1901545.
  3. S. P. Gong, C. L. Wang, P. Jiang, K. Yang, J. Lu, M. X. Huang, S. Chen, J. Z. Wang and Q. W. Chen, O Species Decorated Graphene Shell Encapsulating Iridium-Nickel alloy as Efficient Electrocatalysts towards Hydrogen Evolution Reaction, *J. Mater. Chem. A*, 2019, **7**, 15079-15088.
  4. C. Zhang, B. H. Chen, D. H. Mei and X. Liang, The OH--driven synthesis of Pt–Ni nanocatalysts with atomic segregation for alkaline hydrogen evolution reaction, *J. Mater. Chem. A*, 2019, **7**, 5475-5481.
  5. Z. H. Wei, Y. Liu, Z. K. Peng, H. Q. Song, Z. Y. Liu, B. Z. Liu, B. J. Li, B. Yang and S. Y. Lu, Cobalt-Ruthenium Nanoalloys Parceled in Porous Nitrogen-Doped Graphene as Highly Efficient Difunctional Catalysts for Hydrogen Evolution Reaction and Hydrolysis of Ammonia Borane, *ACS Sustainable Chem. Eng.*, 2019, **7**, 7014-7023.
  6. L. S. Zhang, J. J. Lu, S. B. Yin, L. Luo, S. Y. Jing, A. Brouzgou, J. Chen, P. K. Shen and P. Tsiakaras, One-Pot Synthesized Boron-Doped RhFe Alloy with Enhanced Catalytic Performance for Hydrogen Evolution Reaction, *Appl. Catal. B Environ.*, 2018, **230**, 58–64.

7. Y. Xu, S. L. Yin, C. J. Li, K. Deng, H. R. Xue, X. N. Li, H. J. Wang and L. Wang, Low-ruthenium-content NiRu nanoalloys encapsulated in nitrogen-doped carbon as highly efficient and pH-universal electrocatalysts for the hydrogen evolution reaction, *J. Mater. Chem. A*, 2018, **6**, 1376.
8. J. Deng, P. J. Ren, D. H. Deng and X. H. Bao, Enhanced Electron Penetration through an Ultrathin Graphene Layer for Highly Efficient Catalysis of the Hydrogen Evolution Reaction, *Angew. Chem. Int. Ed.*, 2015, **54**, 2100–2104.
9. Y. Shen, Y. F. Zhou, D. Wang, X. Wu, J. Li and J. Y. Xi, Nickel–Copper Alloy Encapsulated in Graphitic Carbon Shells as Electrocatalysts for Hydrogen Evolution Reaction, *Adv. Energy Mater.*, 2018, **8**, 1701759.
10. C. H. Chen, D. Y. Wu, Z. Li, R. Zhang, C. G. Kuai, X. R. Zhao, C. K. Dong, S. Z. Qiao, H. Liu and X. W. Du, Ruthenium-Based Single-Atom Alloy with High Electrocatalytic Activity for Hydrogen Evolution, *Adv. Energy Mater.*, 2019, **9**, 1803913.
11. Z. M. Cao, Q. L. Chen, J. W. Zhang, H. Q. Li, Y. Q. Jiang, S. Y. Shen, G. Fu, B. A. Lu, Z. X. Xie and L. S. Zheng, Platinum-nickel alloy excavated nano-multipods with hexagonal close-packed structure and superior activity towards hydrogen evolution reaction, *Nat. Commun.*, 2017, **8**, 15131.
